# Supplementary material for: A GH3 family member, OsGH3-2, modulates auxin and abscisic acid levels and differentially affects drought and cold tolerance in rice
Source: PubMed Central journal article supplement — J Exp Bot. 2012 Nov 8;63(18):6467–80. doi: 10.1093/jxb/ers300 (PMC3504496; doi:10.1093/jxb/ers300), 2012-11-08
Supplement: supp_ers300_jexbot086090_file001.pdf [file supp_ers300_jexbot086090_file001.pdf]

## **Supplementary data**

### **A GH3 family member OsGH3-2 modulates auxin and abscisic acid levels and differentially affects drought and cold tolerance in rice**

Hao Du, Nai Wu, Jing Fu, Shiping Wang, Xianghua Li, Jinghua Xiao, Lihong Xiong\*

Supplementary Figures

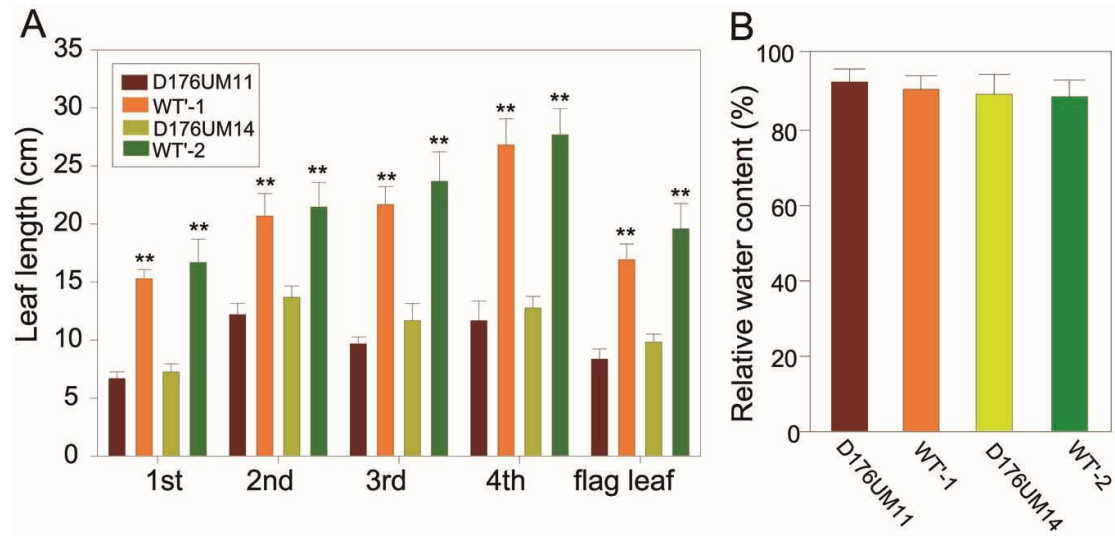

**Supplementary Fig. S1.** (A) Leaf blade length of mature *OsGH3-2*-overexpression rice. (B) Relative water content (RWC) in *OsGH3-2*-overexpression rice and WT'.

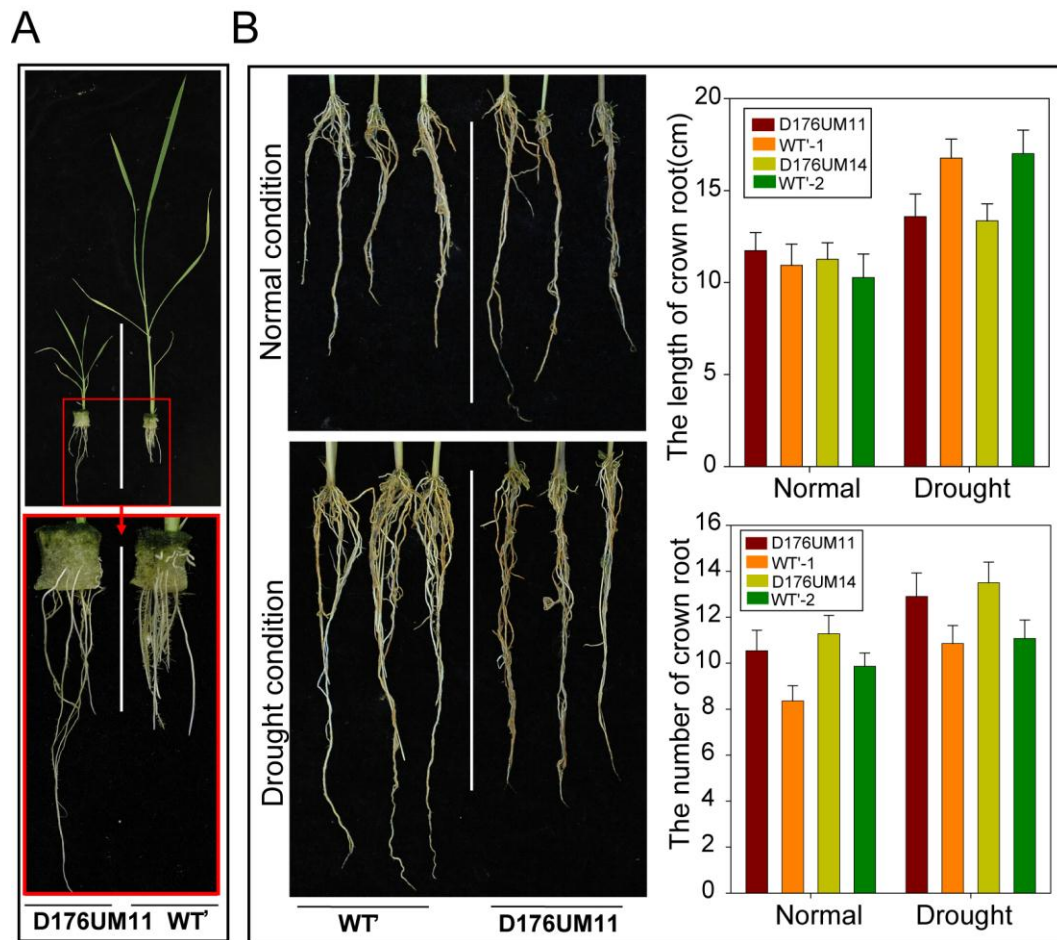

**Supplementary Fig. S2.** The root phenotypes at different growth conditions.

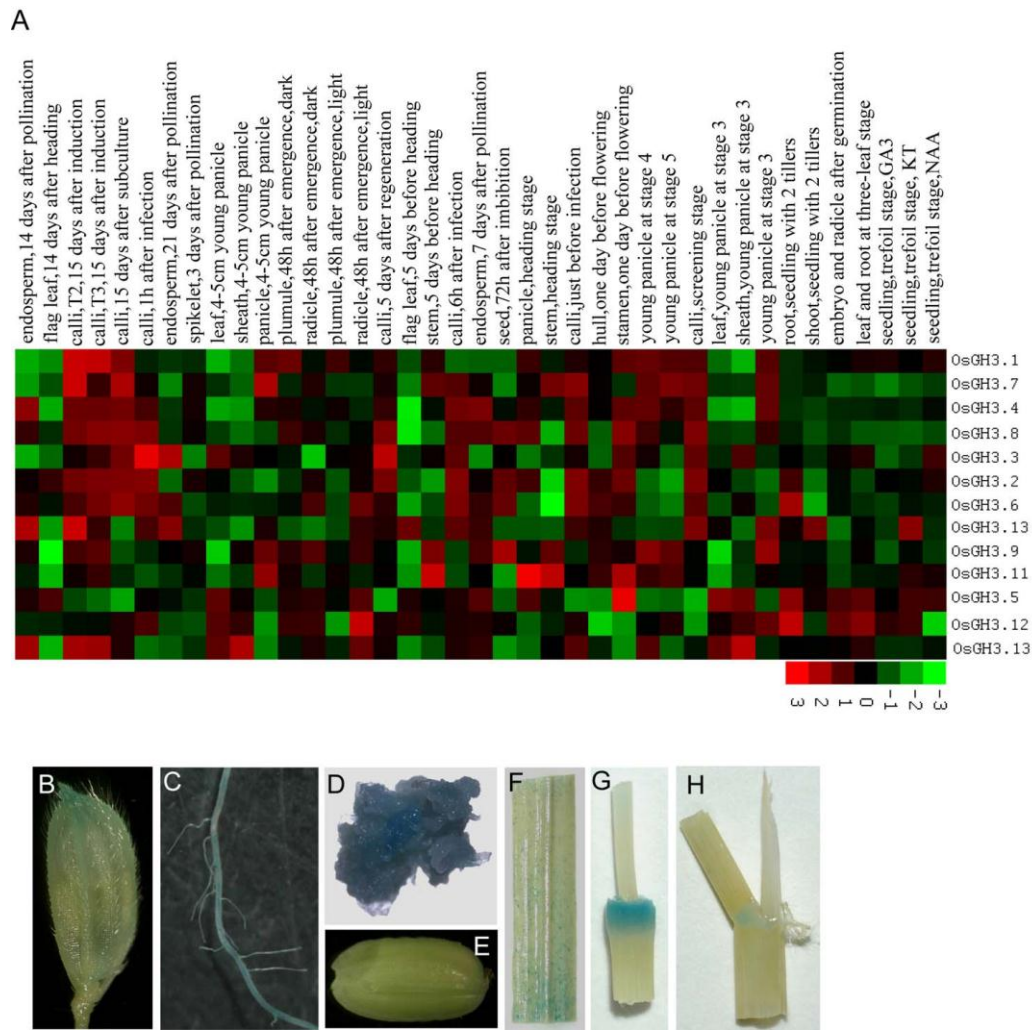

**Supplementary Fig. S3.** Expression profile of *OsGH3-2* and other members in the family.

(A) Expression profiles of 13 *OsGH3* family genes in the tissues and organs covering the entire life cycle of rice.

(B-H) GUS staining in spikelet (B), root (C), calli (D), seed (E), leaf blade at tiller stage (F), node (G), ligule, auricle and pulvinus (H).

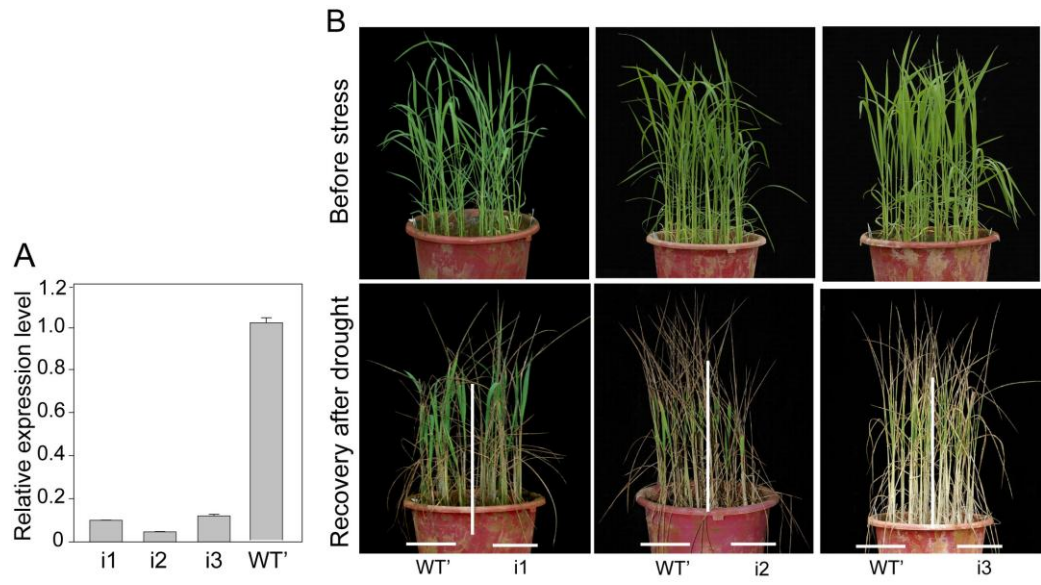

**Supplementary Fig. S4.** Relative expression level (A) and phenotype (B) of *OsGH3-2*-RNAi transgenic rice under drought stress.

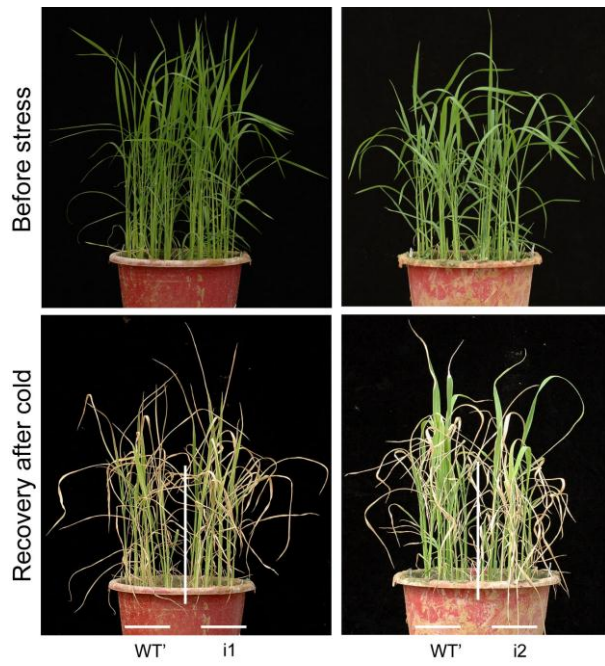

**Supplementary Fig. S5.** Phenotype of *OsGH3-2*-RNAi transgenic rice under cold stress.

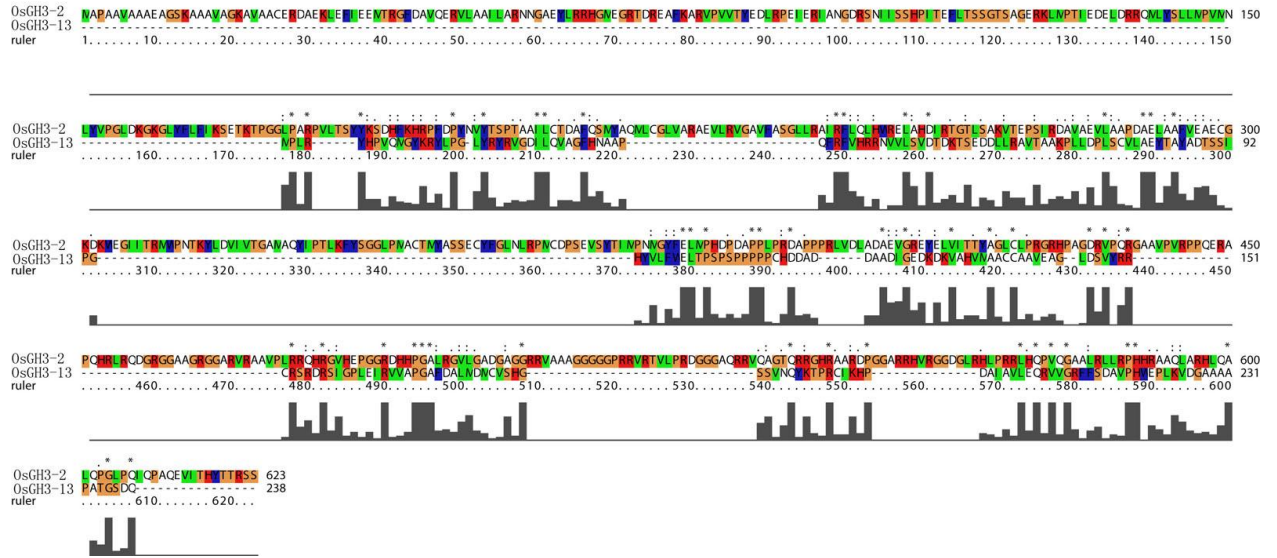

**Supplementary Fig. S6.** Sequence alignment of OsGH3-2 and OsGH3-13.

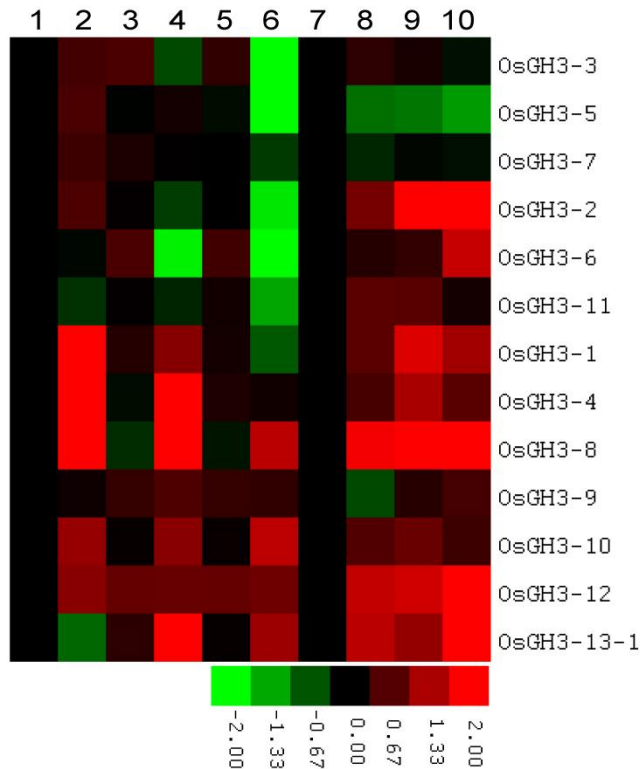

**Supplementary Fig. S7.** Expression profiles of 13 *OsGH3* family genes under cold (4°C) and drought stress conditions at the five-leaf-stage. lane 1: cold 6h-ck; 2: cold 6h; 3: cold 30h-ck; 4: cold 30h; 5: cold 78h-ck; 6: cold 78h; 7:drought-ck; 8: drought 1d; 9: drought 2d; 10: drought 3d.



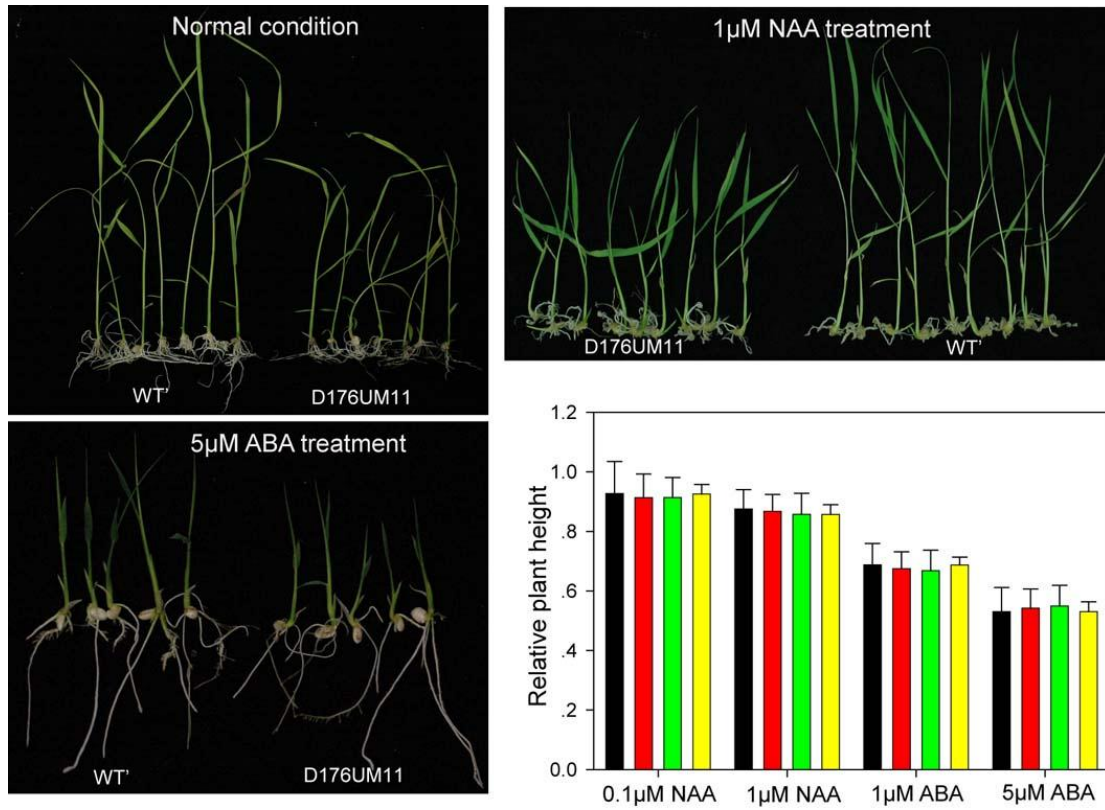

**Supplementary Fig. S8.** Phenotypes of D176UM11, D176UM14, and WT' grown in medium with NAA or ABA treatment.

**Supplementary Table S1.** Primer sequences used in this study.

| <b>Primer name</b> | <b>Accession number</b> | <b>Primer sequence</b>  | <b>primer region</b> |
|--------------------|-------------------------|-------------------------|----------------------|
| OsGH3-1rtF         |                         | GAGATGACGACTTAGCCTATATG |                      |
| OsGH3-1rtR         | LOC_Os01g57610          | TTTGAGACGGAGGAAATAACAT  | CDS                  |
| OsGH3-2rtF         |                         | AGCCTTCTACTACAACACTACT  |                      |
| OsGH3-2rtR         | LOC_Os01g55940          | TGACACTGACACCGACTG      | 5'UTR                |
| OsGH3-3rtF         |                         | ATGCTTCACCACATCATT      |                      |
| OsGH3-3rtR         | LOC_Os01g12160          | CTCTCCAGTTACGGATAAG     | CDS                  |
| OsGH3-4rtF         |                         | GACGACGACCTGTGATAG      |                      |
| OsGH3-4rtR         | LOC_Os05g42150          | TCCATGCTTAATTAGCTCCTTA  | CDS                  |
| OsGH3-5rtF         |                         | CATTGACGCAGGCTACAC      |                      |
| OsGH3-5rtR         | LOC_Os05g50890          | ACCACCAAGGCTTAGGAA      | CDS                  |
| OsGH3-6rtF         |                         | GGTGTTCATCTCCGATTC      |                      |
| OsGH3-6rtR         | LOC_Os05g05180          | GTGAGGGATTCTTCTTGTAG    | CDS                  |
| OsGH3-7rtF         |                         | GGTCTCAGGAGTATCATT      |                      |
| OsGH3-7rtR         | LOC_Os06g30440          | GTTGTGTCTACAGTTACG      | CDS                  |
| OsGH3-8rtF         |                         | GTCCAAGAATCTGAAGTAGTAG  |                      |
| OsGH3-8rtR         | LOC_Os07g40290          | TTGCCACTAACTGACAGA      | 5'UTR                |
| OsGH3-9rtF         |                         | CGTCGTGTCTAGCCAATT      |                      |
| OsGH3-9rtR         | LOC_Os07g38890          | AATAAAGATGCCAAACAGGATG  | CDS                  |
| OsGH3-10rtF        |                         | ATCGTCACGGATGAGATG      |                      |
| OsGH3-10rtR        | LOC_Os07g38860          | TTACACGTTCAAGACAGATG    | CDS                  |
| OsGH3-11rtF        |                         | AGTGGAGACTCTGGTTAG      |                      |
| OsGH3-11rtR        | LOC_Os07g47490          | GACAGTTATTGGTTCTTCATC   | CDS                  |
| OsGH3-12rtF        | LOC_Os11g08340          | CGTGCTCCGGGTCCTTAA      | CDS                  |

|              |                |                               |       |
|--------------|----------------|-------------------------------|-------|
| OsGH3-12rtR  |                | TCAATCGTAGTCGTAGGCAGTG        |       |
| OsGH3-13rtF  |                | TCGTCGGTGAACCAGTACAAGA        |       |
| OsGH3-13rtR  | LOC_Os11g32510 | ACGGCGTCGCTGAAGAAG            | CDS   |
| OsLCYrtF     |                | GGTGCCTCGTCCAGTACGA           |       |
| OsLCYrtR     | LOC_Os02g09750 | CATGAACAGCATCTTGTCGATGT       | CDS   |
| OsCRTISrtF   |                | GATCATGTGTGCTCATCGAGTTG       |       |
| OsCRTISrtR   | LOC_Os11g36440 | CCCAAGAAGACCCGCATCT           | 5'UTR |
| OsPSYrtF     |                | AGGCCAACGATTACAACAACCTTC      |       |
| OsPSYrtR     | LOC_Os09g38320 | TAAGCTTTAGGCAGAGCCACAAT       | CDS   |
| OsZDSrtF     |                | GGAACCAAAGGTGGCATAACG         |       |
| OsZDSrtR     | LOC_Os07g10490 | CAATGGGTTCAATGATCGGTTA        | 5'UTR |
| OsTATCrF     |                | TTGTTGTTGGCGCTGTAGTTG         |       |
| OsTATCrR     | LOC_Os01g31680 | GACCAGCCAAGAGCATCTGAGT        | CDS   |
| OsZEPrtF     |                | CGAACTTCCCTGTCCGTTTC          |       |
| OsZEPrtR     | LOC_Os01g31680 | GGAACACGGCCTTTTTATCTGA        | CDS   |
| OsNCED1rtF   |                | TCCAGTCACAGCACCAATGATAC       |       |
| OsNCED1rtR   | LOC_Os02g47510 | TGTTCCACA GTAACTCGTAATTTTCG   | CDS   |
| OsNCED2rtF   |                | TCCGTTGCCCAAGATCAAG           |       |
| OsNCED2rtR   | LOC_Os04g04230 | CGTCCAACCGTGCAATCAC           | CDS   |
| OsNCED4rtF   |                | GATTGCACGGCACCTTCATT          |       |
| OsNCED4rtR   | LOC_Os07g05940 | CTCTGTAATTTGATTTTTCACTGGCTAAT | 5'UTR |
| OsNCED5rtF   |                | CCCAGCTTGAAGCTTTTGCT          |       |
| OsNCED5rtR   | LOC_Os12g42280 | ACAACACTGCAACTATCCCTATCACT    | 5'UTR |
| OsABA8ox1rtF |                | GATGAAGAGGCCCTGATTGG          |       |
| OsABA8ox1rtR | LOC_Os02g47470 | GATTATTCGACCTATAGCTGCATCTG    | CDS   |
| OsABA8ox2rtF | LOC_Os08g36860 | CACGTACTACTGCTGATGGTGGCT      | CDS   |



|              |                |                          |       |
|--------------|----------------|--------------------------|-------|
| OsABA8ox2rtR |                | GATTACAGGAGAGATCGATCGA   |       |
| OsABA8ox3rtF |                | ATGGCCTTCTCGCGAAATT      |       |
| OsABA8ox3rtR | LOC_Os09g28390 | ATCACCGTTCTGGCAACCA      | CDS   |
| OsIAA1rtF    |                | GCCGCTCAATGAGGCATT       |       |
| OsIAA1rtR    | LOC_Os01g08320 | GCTTCCACTTTCTTTCAATCCAA  | 5'UTR |
| OsIAA3rtF    |                | AACTGAACAACAACAAGAAGAA   |       |
| OsIAA3rtR    | LOC_Os12g40900 | GCAATGAGGAGATGAGATGA     | CDS   |
| OsIAA9rtF    |                | AAGAAAATGGCCAATGATGATCA  |       |
| OsIAA9rtR    | LOC_Os02g56120 | CCCATCACCATCCTCGTAGGT    | CDS   |
| OsIAA20rtF   |                | TTGTACGTGAACGGGATTATTTTG |       |
| OsIAA20rtR   | LOC_Os06g07040 | CATGCTTATGAAATTGCTGAAACA | CDS   |
| OsIAA23rtF   |                | GAAGATGTTCTCGTCGAGTC     |       |
| OsIAA23rtR   | LOC_Os06g39590 | GTCTTGCGATAAGTTGA        | CDS   |
| OsISAP1rtF   |                | GCTGTTCTTCTCTCGCAAT      |       |
| OsISAP1rtR   | LOC_Os09g31200 | ACCACCTCACATCACCAT       | CDS   |
| OsNal1rtF    |                | TTGTAGGATGTTAGGTGCTA     |       |
| OsNal1rtR    | LOC_Os04g52479 | AATGGTGTATATCAGGTCTCA    | CDS   |
| SAUR39rtF    |                | CTAAGGTTGTCTGAGGAT       |       |
| SAUR39rtR    | LOC_Os09g37330 | CAAGCACATCACATACTC       | CDS   |
| OsPIDrtF     |                | TTTCTCGTTGACCCTTAGC      |       |
| OsPIDrtR     | LOC_Os12g42020 | AGGTGATTAGCAGTGATTA ACT  | CDS   |
| OsRAA1rtF    |                | GAGTGATGAGTAGTGGTAT      |       |
| OsRAA1rtR    | LOC_Os01g15340 | TGATACACATAACAAGTAAGC    | CDS   |
| OsCOW1rtF    |                | CAGCAGCAGCGAGCAGATG      |       |
| OsCOW1rtR    | LOC_Os03g06654 | CCTCCTCCTCCTCCTCCTCCTC   | CDS   |
| OsAGAPrtF    | LOC_Os02g10480 | AAGCAGTGATCCTTATGTAG     | CDS   |

|             |                |                         |       |
|-------------|----------------|-------------------------|-------|
| OsAGAPrtR   |                | CTTGAGTTCTTCGTTCCA      |       |
| OsCKI1rtF   |                | AGATGATGCTGAGATATGCTTA  |       |
| OsCKI1rtR   | LOC_Os02g40860 | TCTTCTGAATGGCGTGTA      | CDS   |
| OsGNOM1rtF  |                | GCAACCTGATTCACTATTACA   |       |
| OsGNOM1rtR  | LOC_Os03g46330 | ATTAGCAGTTCCAGACAGA     | CDS   |
| OsPIN1rtF   |                | TCTACTACATCTTGCTTGG     |       |
| OsPIN1rtR   | LOC_Os02g50960 | TTCTTAACATGGCTGGTT      | CDS   |
| OsPP2C49rtF |                | GGCTTATTCTCTTCCTCCTCTAT |       |
| OsPP2C49rtR | LOC_Os05g38290 | AGTAAATTCTTTGCGACGATGAT | CDS   |
| OsPP2C30rtF |                | CCATCAGACATACTACTC      |       |
| OsPP2C30rtR | LOC_Os03g16170 | GATCACATAATTCGGAAC      | CDS   |
| OsZIP23rtF  |                | GGAGCAGCAAAGAATGAGG     |       |
| OsZIP23rtR  | LOC_Os02g52780 | GGTCTTCAGCTTCACCATCC    | 5'UTR |

---

**Supplementary Table S2.** Accession numbers and protein sequences for GH3 homologues in Arabidopsis and rice.

| TIGR locus ID | TIGR locus ID  | Protein                                                                                                                                                                                                                                                                                                                                                                                                                                                                                                                                                                                                                                                                          |
|---------------|----------------|----------------------------------------------------------------------------------------------------------------------------------------------------------------------------------------------------------------------------------------------------------------------------------------------------------------------------------------------------------------------------------------------------------------------------------------------------------------------------------------------------------------------------------------------------------------------------------------------------------------------------------------------------------------------------------|
|               |                | MAPAAVAAAAGSKAAAVAGKAVAACERDAEKLEFIEEMTRGFDAVQERVLAAILARNNG<br>AEYLRRHGMEGRDREAFKARVPVVTYEDLRPEIERIANGDRSNISSHPIEFLTSSGT<br>SAGERKLMPTIEDELDRRQMLYLLMPVMNLYVPLDKGKGLYFLFIKSETKTPGGLPAR<br>PVLTSYYKSDHFKHRPFDYNYVTSPTAAILCTDAFQSMYAQMLCGLVARAEVLRVGAVF<br>ASGLLRRAIRFLQLHWRELAHDIRTGTLAKVTEPSIRDVAEVLAAAPDAELAAAFVEAECG<br>KDKWEGIITRMWPNTKYLDVIVTGAMAQYIPLKIFYSGGLPMACTMYASSECYFGLNLRP<br>MCDPSEVSYTIMPNMGYFELMPHDPDAPPLPRDAPPPRLVDLADAIEVGREYELVITTYAG<br>LCLPRGRHPAGDRVPQRGAAPVPRPPQERAPQHRLRQDGRGGAAGRGGARVRAAVPLRRQ<br>HRGVHEPGGRDHHPGALRGVLGADGAGGRRVAAAGGGGGPRRVRTLPRDGGGAQRRVQA<br>GTQRRGHRAARDPGGARRHVRGGDGLRHLPRRLHQPVGGAALRLLRPHHRAAQLARHLQA<br>LQPGLPQIQPAQEVITHYTRSS |
| OsGH3-2       | LOC_Os01g55940 |                                                                                                                                                                                                                                                                                                                                                                                                                                                                                                                                                                                                                                                                                  |
|               |                | MPLRYHPVQMGYKRYLPGLYRYRVGDILQVAGFHNAAPQFRFVHRRNVVLSVDTDKTSED<br>DLLRAVTAAKPLLDPLSCVLAEYAYADTSSIPGHYVLFWELTPSPSPPPPCHDDADDA<br>ADIGEDKDKVAHVMAACCAAVEAGLDSVYRRCRSRDRSIGPLEIRVVAPGAFDALMDMCV                                                                                                                                                                                                                                                                                                                                                                                                                                                                                       |
| OsGH3-13      | LOC_OS11g32510 | SHGSSVNQYKTPRCIKHPDAIAVLEQRVVGRFFSDAVPHWEPLKVDGAAAAPATGSDQ                                                                                                                                                                                                                                                                                                                                                                                                                                                                                                                                                                                                                       |
